# Supplementary material
Source: PubMed Central journal article supplement (PMC1805566)

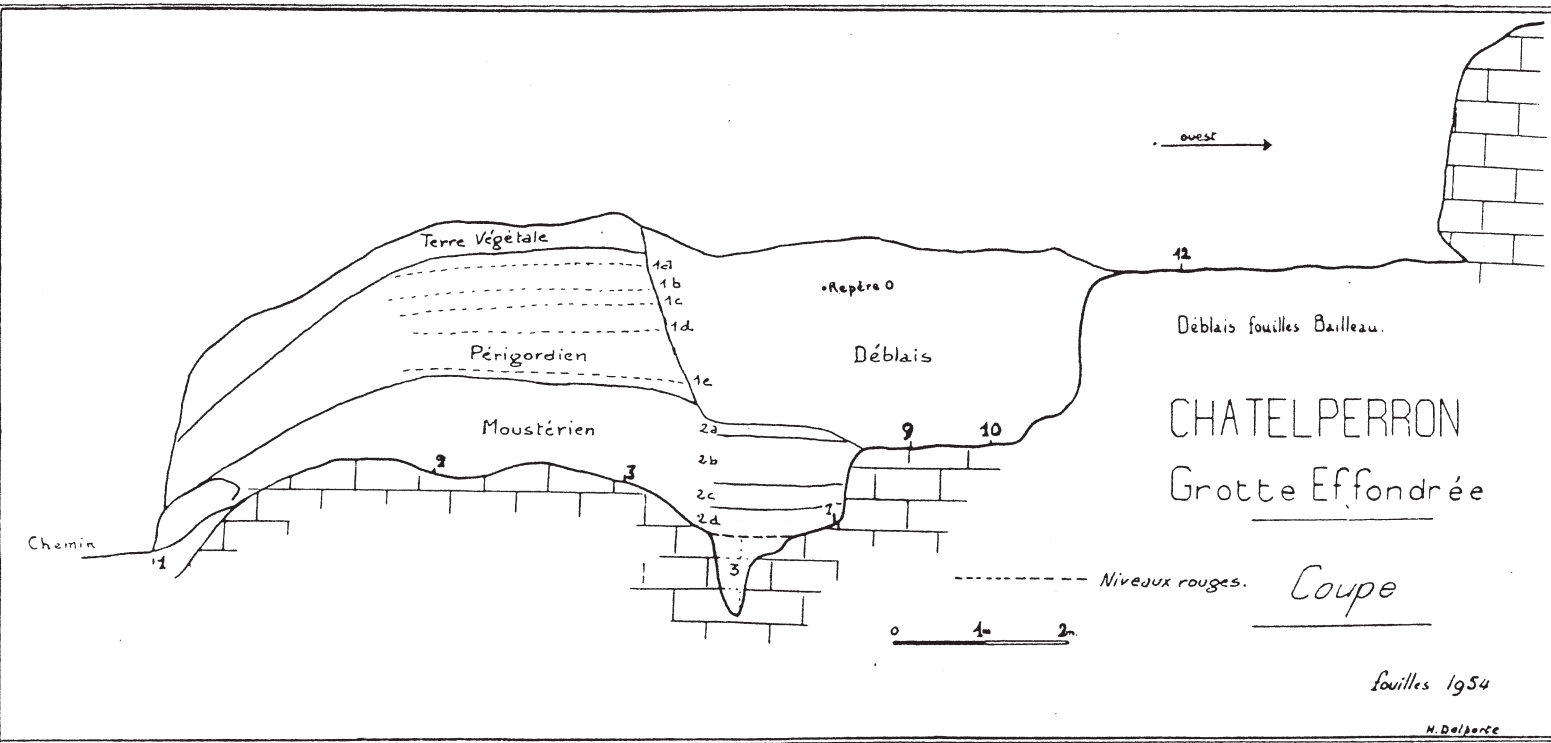

CHATELPERRON  
Grotte Effondrée

*Coupe*

fouilles 1954

H. Delporte

Supplement: pnas_0608053104_1.pdf [file pnas_0608053104_1.pdf]

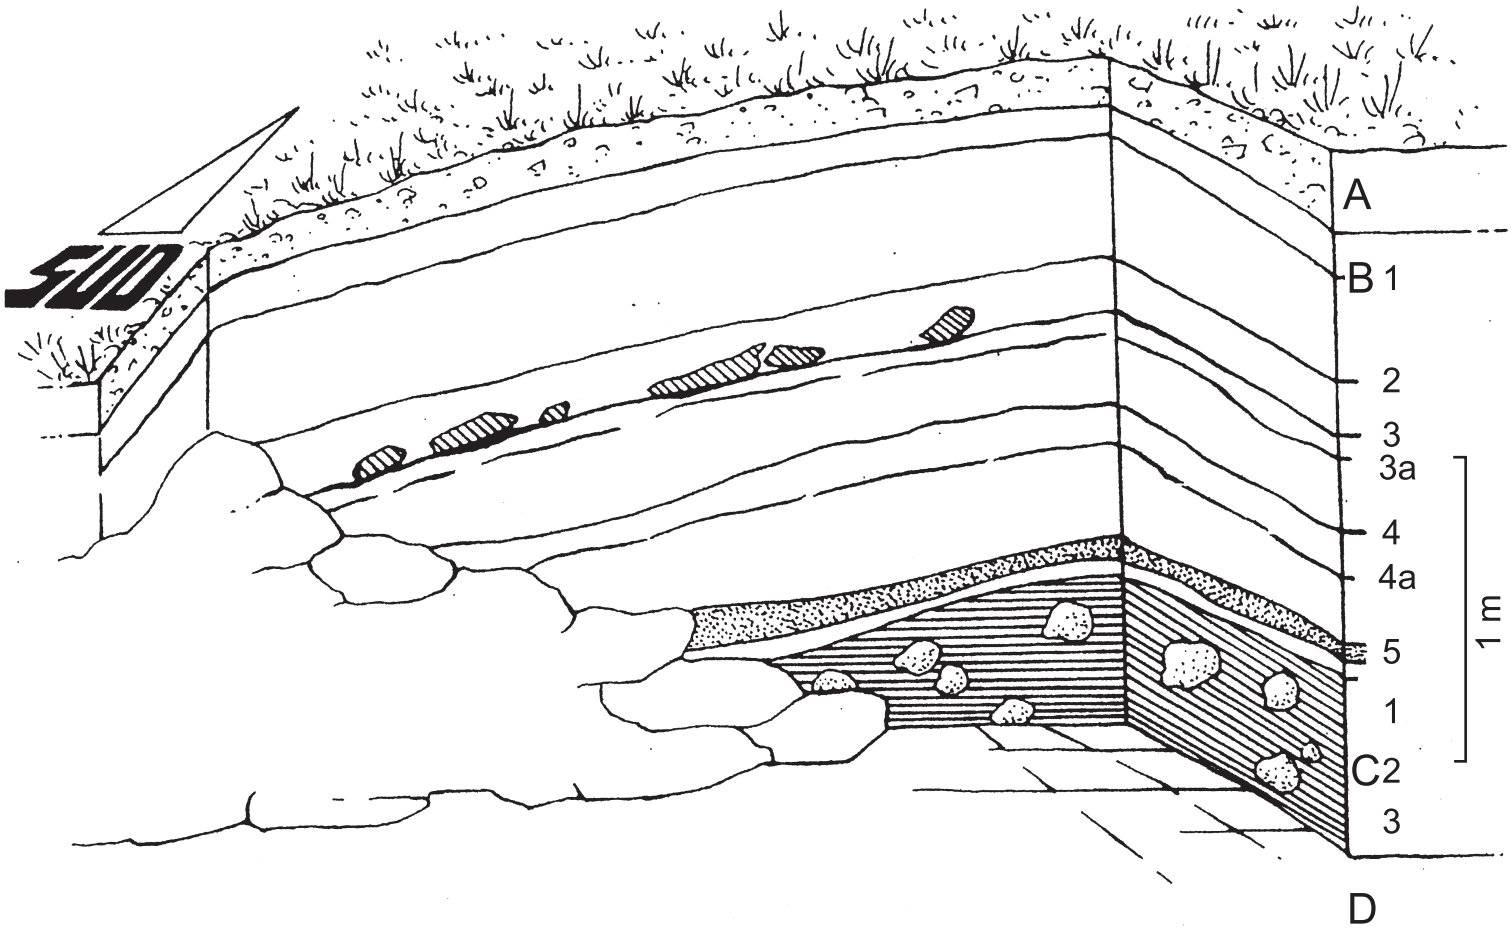

Supplement: pnas_0608053104_2.pdf [file pnas_0608053104_2.pdf]
